# Supplementary figures and images for: Systematic Analysis of Cold Stress Response and Diurnal Rhythm Using Transcriptome Data in Rice Reveals the Molecular Networks Related to Various Biological Processes
Source: MDPI journal article supplement (doi:10.3390/ijms21186872), 2020-09-19

A

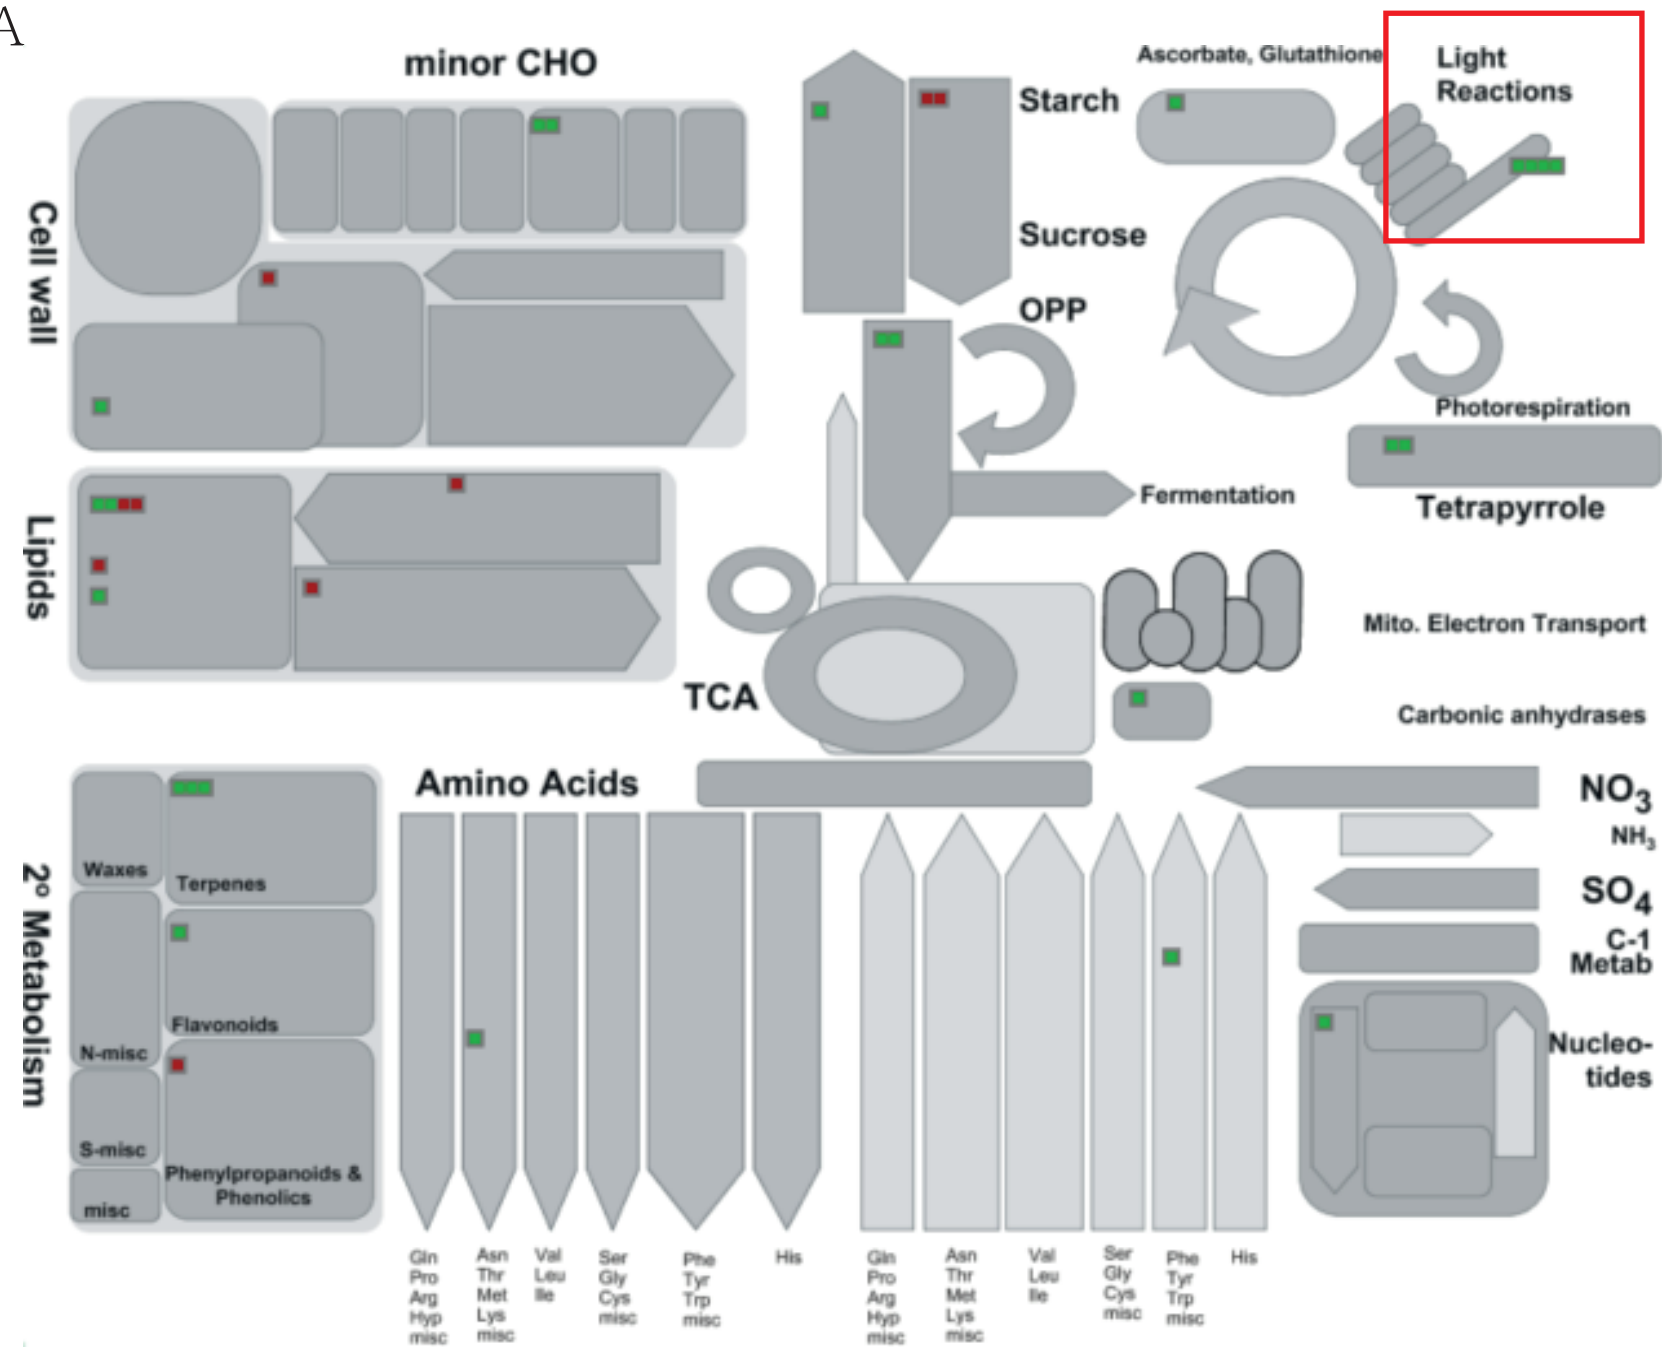

B

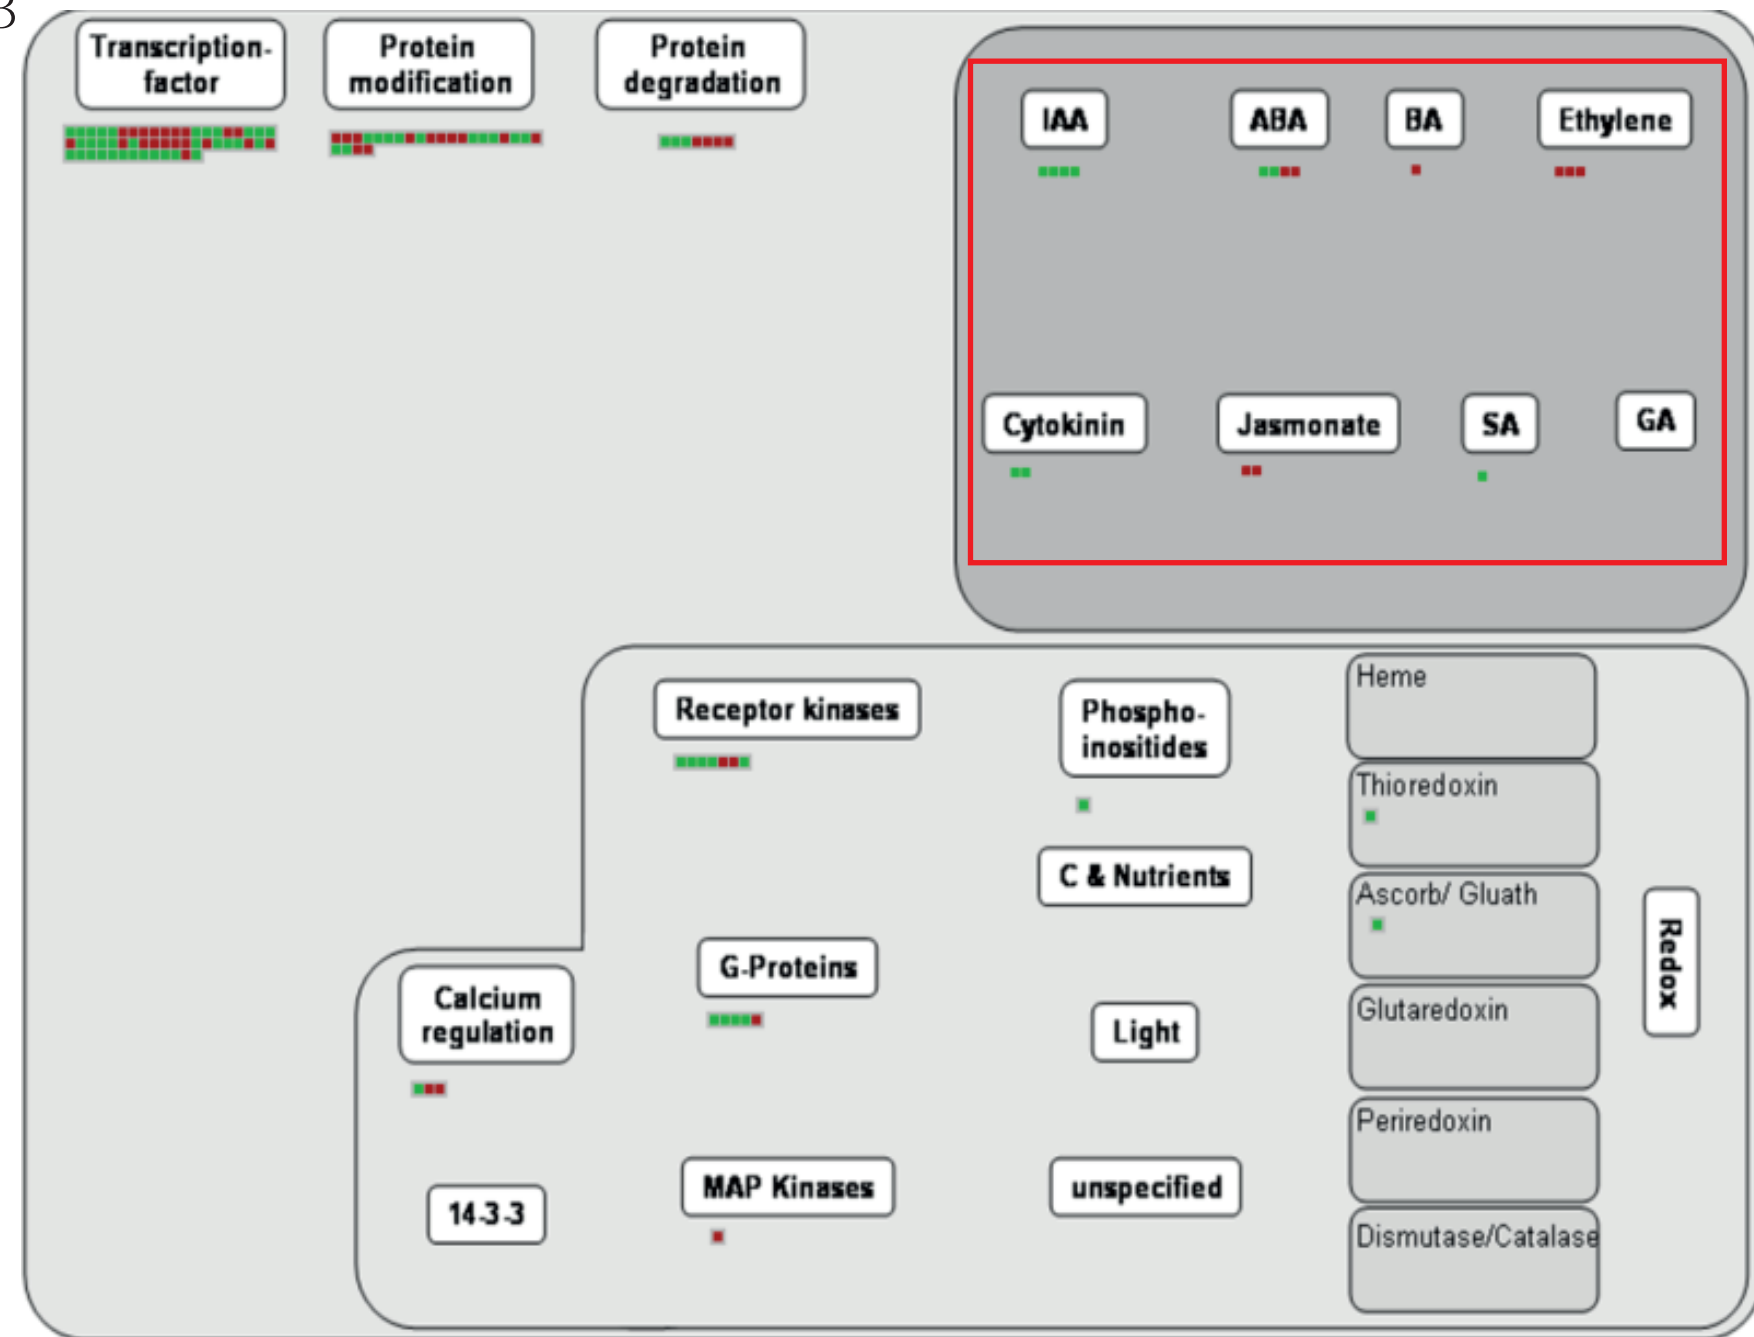

Supplement: s1 [file s1]

Cold 0 day

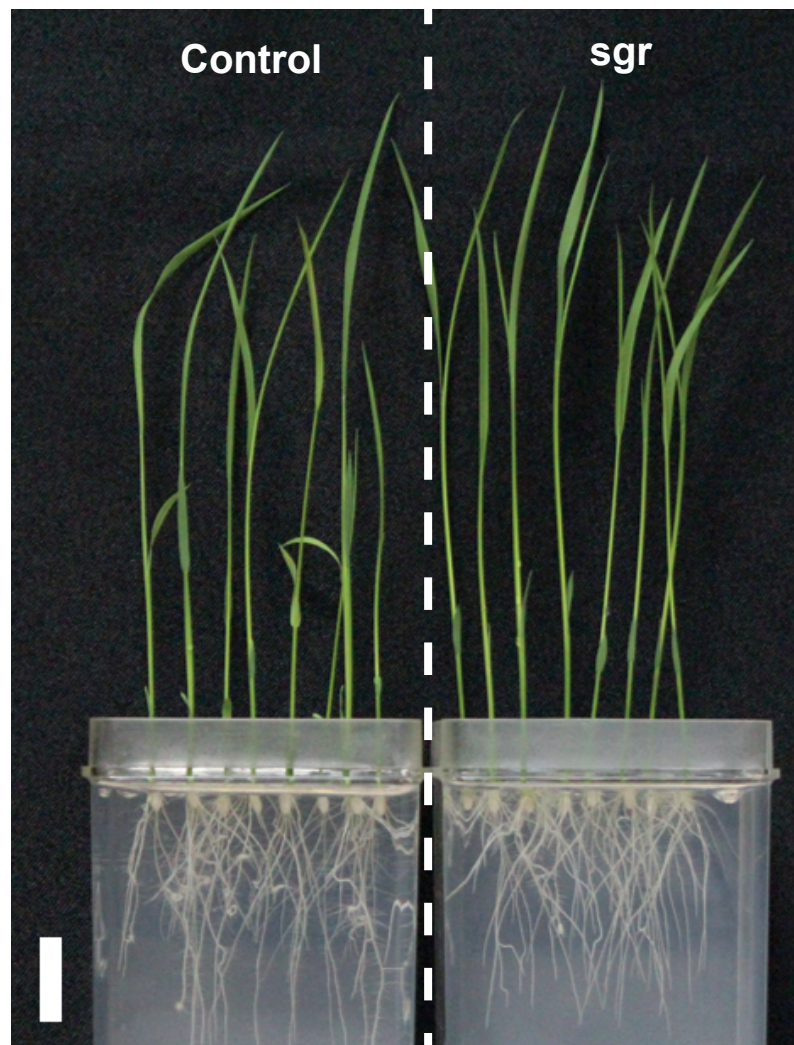

Cold 4 days

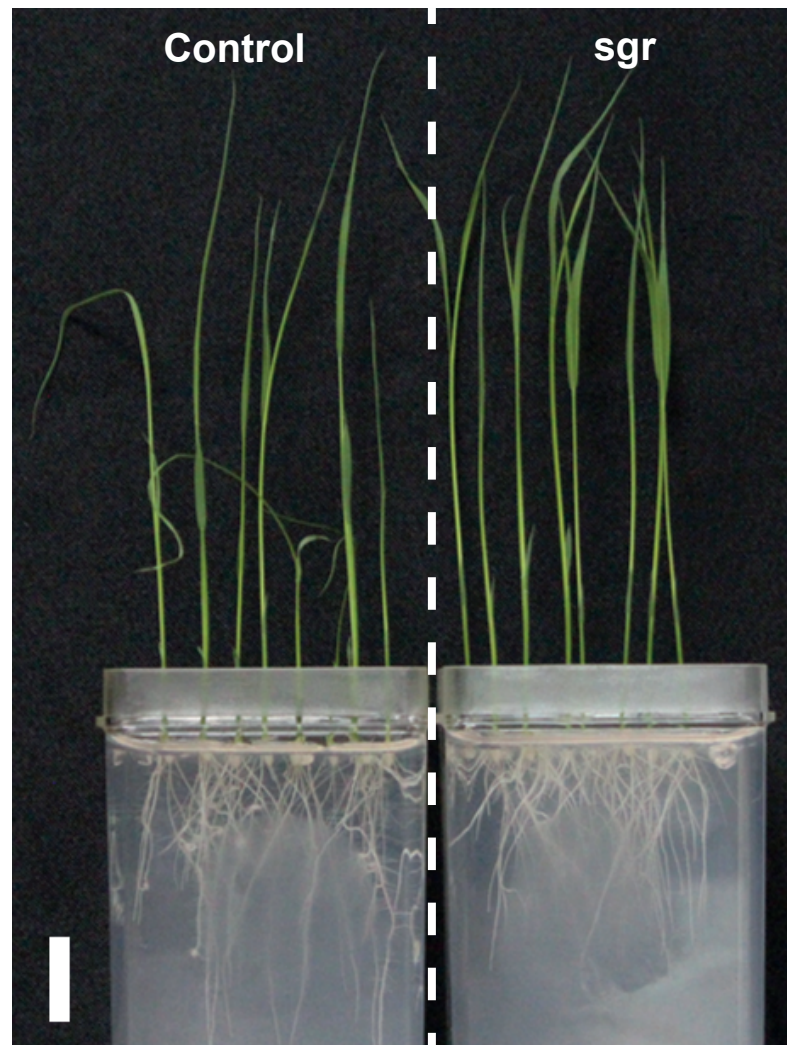

Recovery 5 days

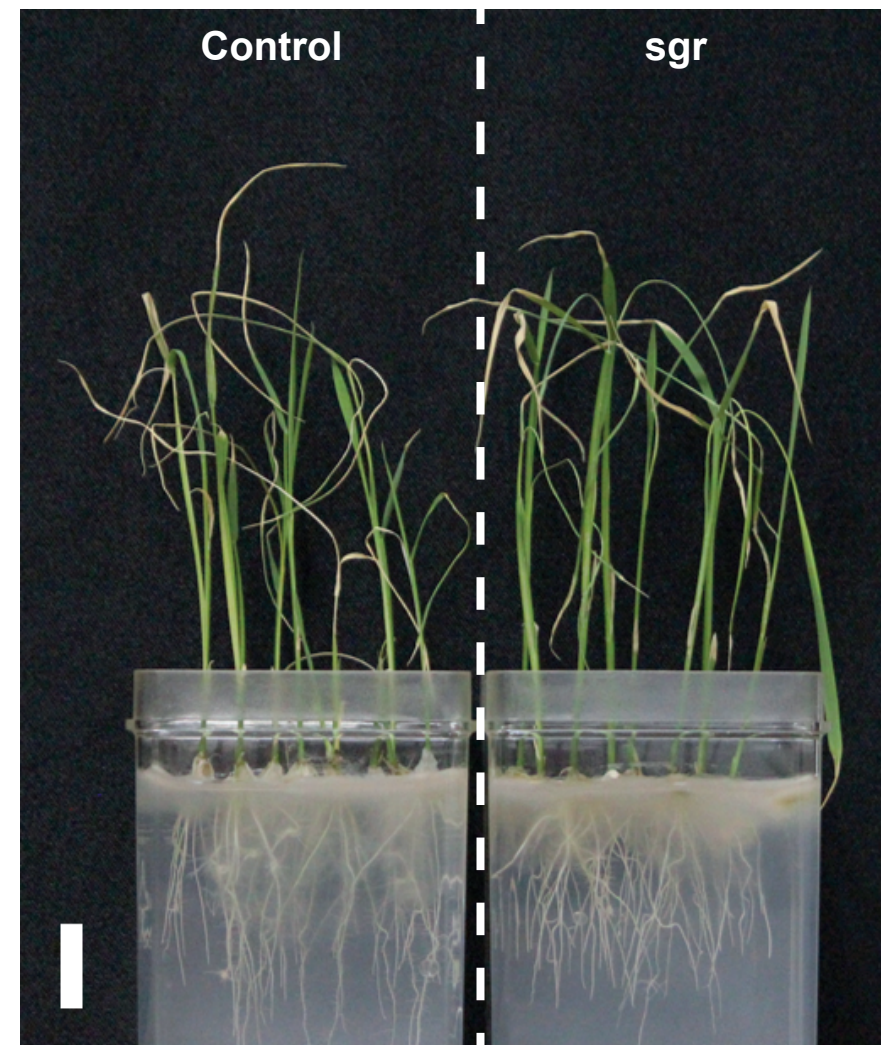

Supplement: s1 [file s1]
